# Supplementary material for: Electrically Conductive and 3D‐Printable Oxidized Alginate‐Gelatin Polypyrrole:PSS Hydrogels for Tissue Engineering
Source: PubMed Central journal article supplement — Adv Healthc Mater. 2021 Mar 12;10(9):2001876. doi: 10.1002/adhm.202001876 (PMC11469227; doi:10.1002/adhm.202001876), 2021-03-12
Supplement: ADHM-10-2001876-s001.pdf [file ADHM-10-2001876-s001.pdf]

**ADVANCED  
HEALTHCARE  
MATERIALS**

Supporting Information

for *Adv. Healthcare Mater.*, DOI: 10.1002/adhm.202001876

Electrically Conductive and 3D-printable Oxidized Alginate-  
Gelatin Polypyrrole:PSS Hydrogels for Tissue Engineering

Thomas Distler, Christian Polley, Fukun Shi, Dominik Schneiderei,  
Mark. D. Ashton, Oliver Friedrich, Jürgen F. Kolb, John G. Hardy,  
Rainer Detsch, Hermann Seitz, and Aldo R. Boccaccini\*

((Supporting Information can be included here using this template))

## Supporting Information

### Electrically Conductive and 3D-printable Oxidized Alginate-Gelatin Polypyrrole:PSS Hydrogels for Tissue Engineering

*Thomas Distler, Christian Polley, Fukun Shi, Dominik Schneidereit, Mark D. Ashton, Oliver Friedrich, Jürgen F. Kolb, John G. Hardy, Rainer Detsch, Hermann Seitz, and Aldo R. Boccaccini\**

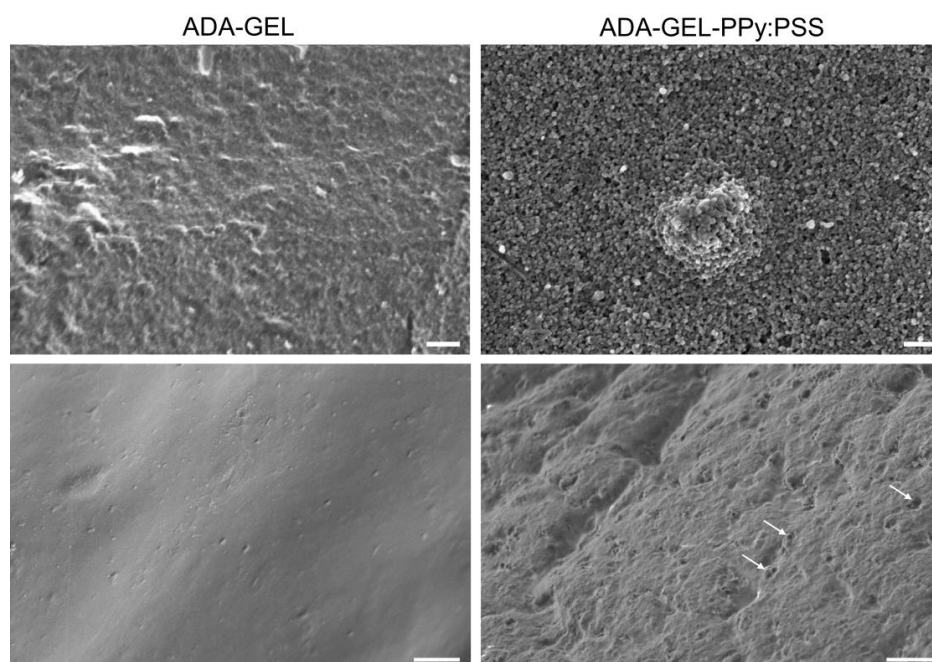

**Figure S1.** SEM images of ADA-GEL (left) and ADA-GEL-PPy:PSS (right). Top row: Hydrogel imaged from the top. Scale bars: 400 nm. The formation of a dense, globular PPy layer can be observed. Bottom row: SEM images from the inside of the hydrogels. Scale bars: 20  $\mu\text{m}$ . A dense hydrogel structure can be observed for the as-prepared hydrogels, as found for 3.75%/7.5% ADA-GEL before.<sup>[56,84]</sup> White arrows indicate the presence of polypyrrole globules surrounded by a dense ADA-GEL matrix.

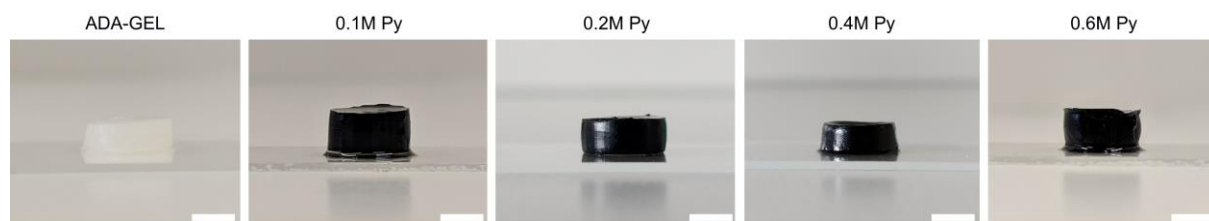

**Figure S2.** Hydrogel cylinders of ADA-GEL-PPy:PSS and ADA-GEL fabricated using different Py molarities. From left to right: ADA-GEL, 0.1M Py, 0.2M Py, 0.4M Py, and 0.6M Py. Scale bars: 5 mm.

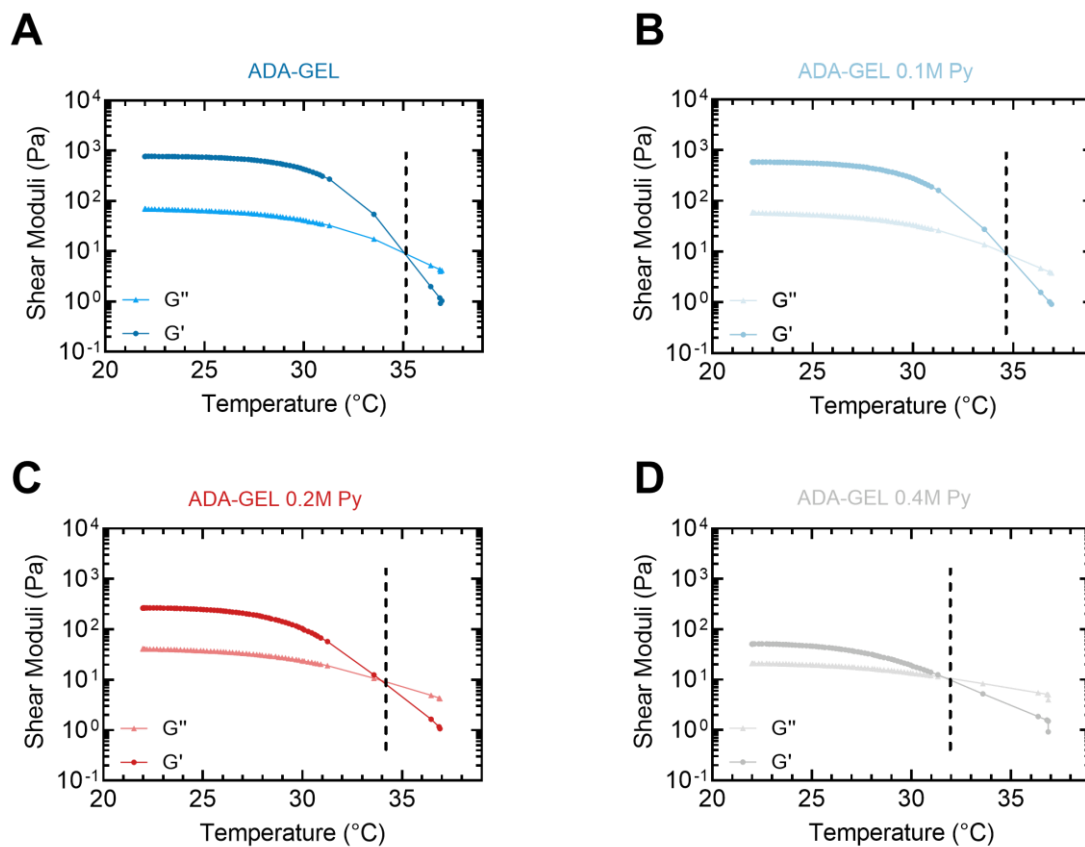

**Figure S3.** Shear moduli  $G'$  and  $G''$  of ADA-GEL and ADA-GEL containing 0.1M Py, 0.2M Py, and 0.4M Py. A shift of the solid-to-liquid state (dashed line) to lower temperatures is observed with increasing Py content.

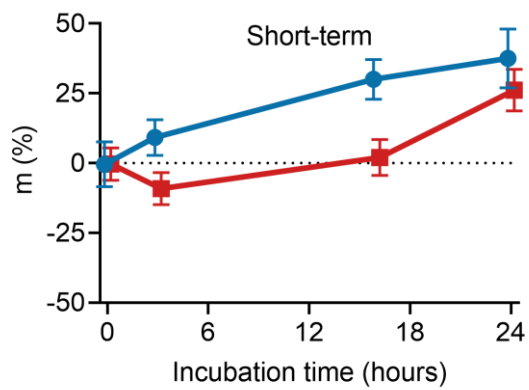

**Figure S4.** Short-term swelling behavior (< 24h) of ADA-GEL (blue) and ADA-GEL-PPy:PSS (red). Data are shown as mean  $\pm$  SD (n = 6).

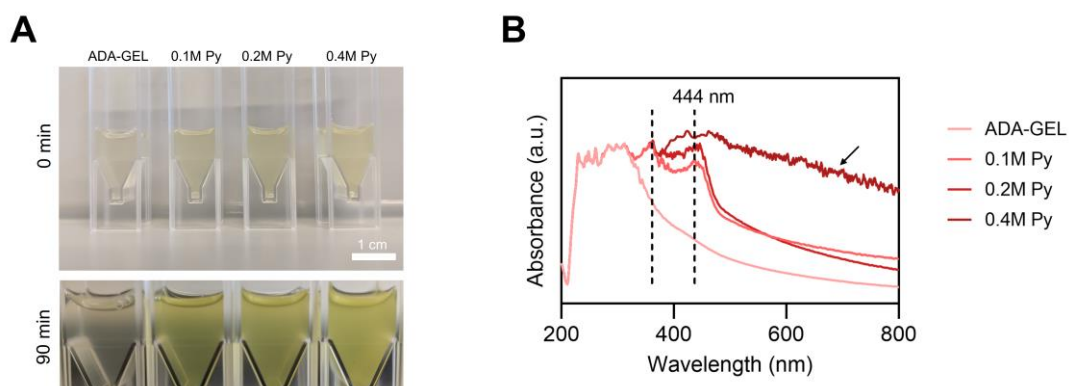

**Figure S5.** Aging of Py-containing ADA-GEL biomaterial ink. A) Macroscopic images showing the aging of the precursors over time, highest for the highest Py-containing precursor. A similar color change was observed for samples stored in the dark in the 3D-printing cartridge compartment. B) UV-vis spectra after 60 min of storage at room temperature (22°C, air atmosphere, not protected from light). Absorbance peaks forming at  $\lambda = \sim 365 - 460$  nm (dashed lines) for Py-containing ADA-GEL observed, indicative of bi-polaron absorbance and suggesting PPy formation in the hydrogel. In addition, 0.4M Py composition shows broad absorption in the range of  $\lambda = 400 - 800$  nm (arrow), indicative of dispersed hydrophobic Py droplets inside the aqueous ADA-GEL, leading to increased initial turbidity (A, 0.4M) and broad absorbance after 60 min.

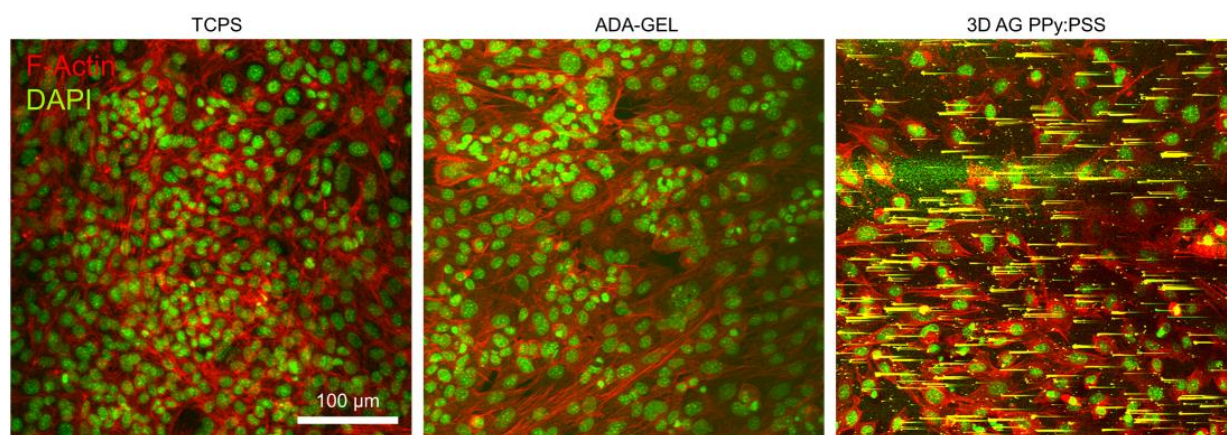

**Figure S6.** Fluorescence microscopy images of ATDC-5 cells grown for seven days on tissue culture polystyrene (TCPS, flat surface), hydrogel cylinders (ADA-GEL, almost flat surface), and 3D-printed hydrogel scaffold (ADA-GEL-PPy:PSS, 3D-printed morphology). Red: F-Actin. Green: Nuclei (DAPI, green colored to allow for higher contrast).

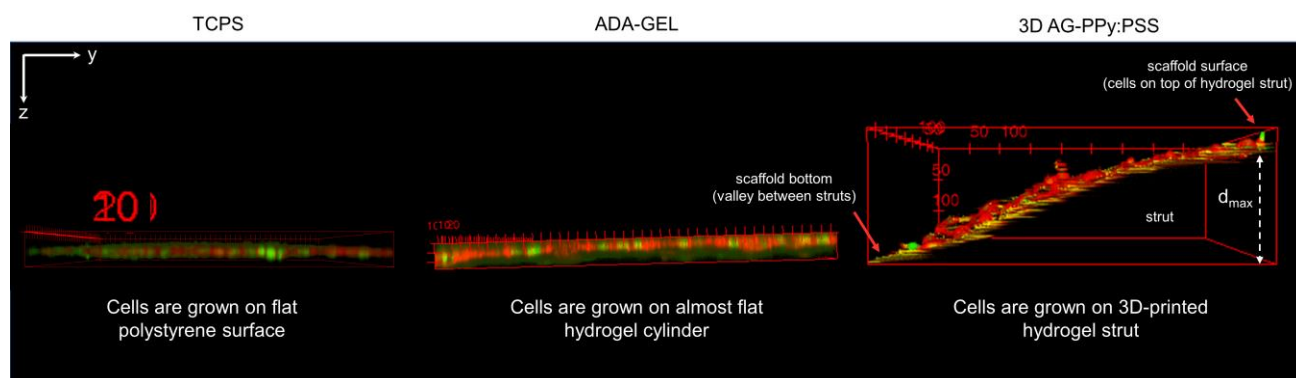

**Figure S7.** Multiphoton fluorescence microscopy images of ATDC-5 cells grown for seven days on tissue culture polystyrene (TCPS, flat surface), hydrogel cylinders (ADA-GEL, almost flat surface), and 3D-printed hydrogel scaffold (ADA-GEL-PPy:PSS, 3D-printed morphology).  $d_{\max}$  describes the depth in z-direction in which cells could be detected on the overall scaffolds. Cells were growing on the scaffold top as well as in grooves between scaffold struts. Red: F-Actin. Green: Nuclei (DAPI, green colored to allow for higher contrast).



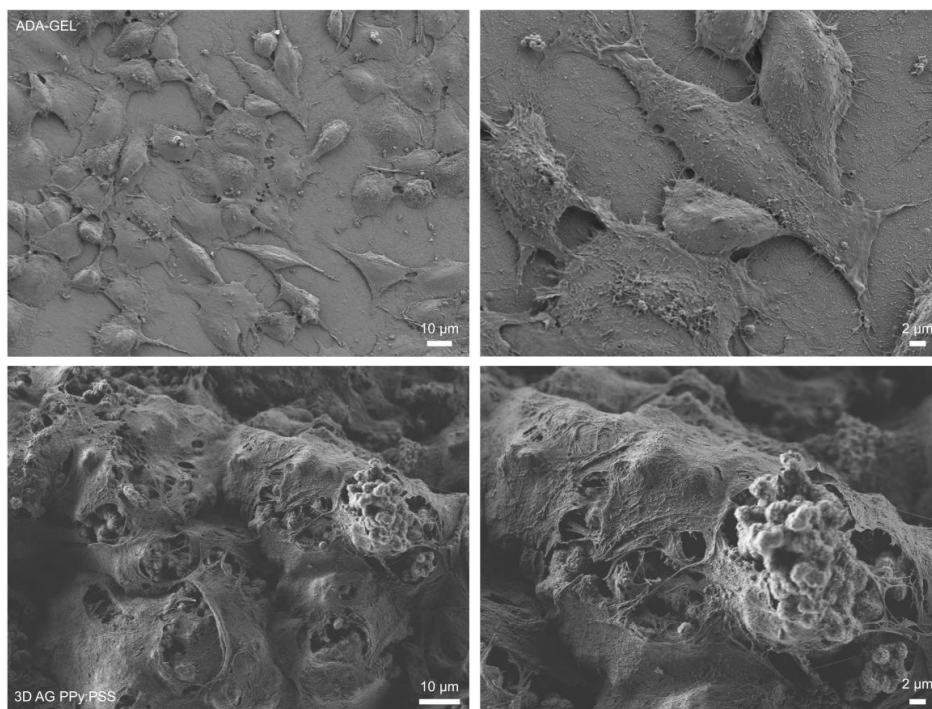

**Figure S8.** Scanning electron microscopy images of ATDC-5 cells grown for seven days on ADA-GEL and 3D-printed ADA-GEL PPy:PSS hydrogels (3D AG PPy:PSS).

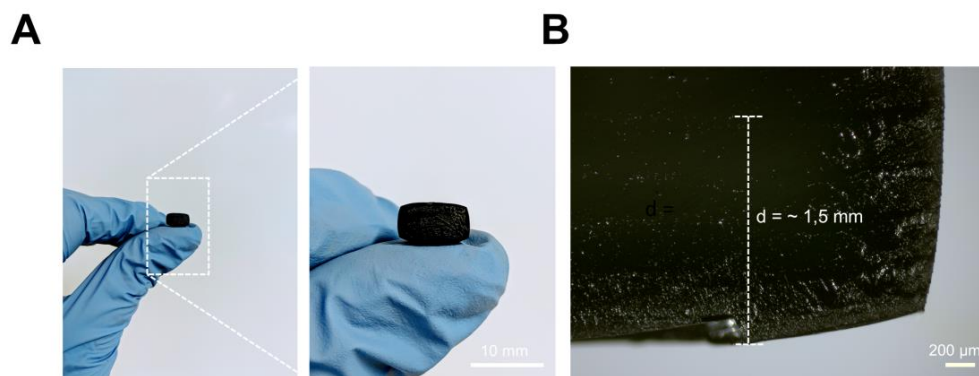

**Figure S9.** Cross section images (A) of an ADA-GEL-PPy:PSS (0.1M PPy) hydrogel cylinder indicating homogenous formation of black polypyrrole throughout the hydrogel (B), reaching a depth (d) of polymerization  $> 1.5$  mm inside the gel.

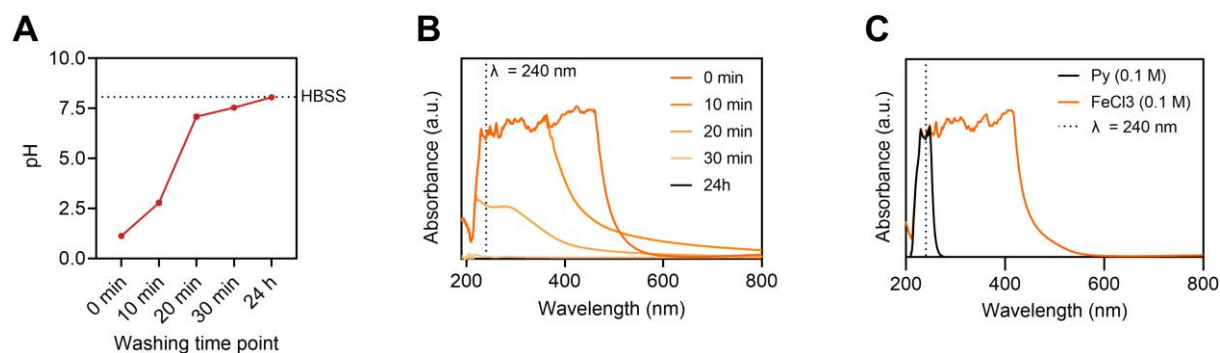

**Figure S10.** pH monitoring and UV-vis measurement of washing supernatant during ADA-GEL-PPy:PSS hydrogel washing using HBSS after oxidation to prepare the hydrogels for cell-culture. HBSS was analysed after 10 min, 20 min, 30 min, and 24 h of washing. Each washing time point consisted of removal of supernatant and replacing with fresh HBSS solution (4 ml). Data are shown as mean  $\pm$  SD ( $n = 4$ ). A) pH was used to monitor  $H^+$  removal which is a byproduct of the polypyrrole synthesis. After 24h, the washing solution surrounding the hydrogel adapted to the pH of fresh HBSS stock solution, indicating the removal of  $H^+$ . B) UV-vis was utilized to ensure removal of Fe-based byproducts ( $\lambda = \sim 250 - 450$  nm) and the absence of un-converted pyrrole ( $\lambda = \sim 210 - 260$  nm). After the last washing step (24h), the data suggest complete removal of Py and  $FeCl_3$  during washing. C) UV-vis of  $FeCl_3$  and Py aqueous solutions (0.1M, in HBSS) which served as controls.

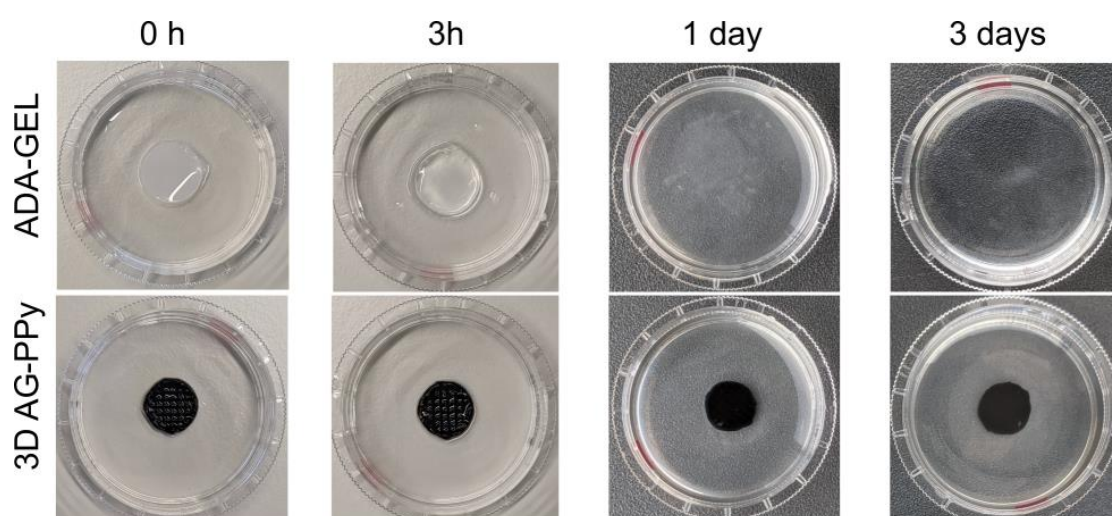

**Figure S11.** Enzymatic degradation of ADA-GEL-PPy:PSS and ADA-GEL mediated by incubation of hydrogel samples ( $n = 4$ ) in solution containing 1 U/ml of collagenase type II at 37°C (in 35 mm petri-dish, Sarstedt, Germany), as performed previously.<sup>[30]</sup>

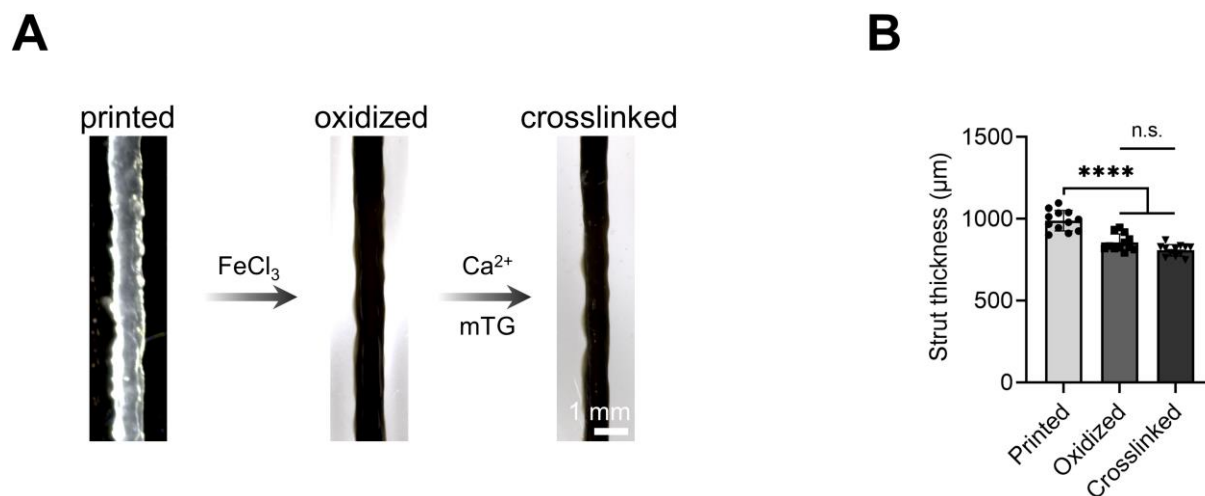

**Figure S12.** Strut thickness of printed, oxidized, and crosslinked ADA-GEL-PPy:PSS ( $n = 3$ , four measurements each print). Struts were printed with a diameter =  $410 \mu\text{m}$  extrusion needle (Nordsen EFD, US). A) Light microscopy images. B) Quantification of strut thickness. Data are shown as mean  $\pm$  SD. A decrease in strut thickness from as-printed ( $\sim 990 \pm 62 \mu\text{m}$ ) to oxidized ( $\sim 860 \pm 50 \mu\text{m}$ ) scaffolds was observed ( $P < 0.0001$ ), analyzed via one-way ANOVA analysis and Bonferroni post-hoc test.

**Table S1.** Simplified molecular-input line-entry system (SMILES) notations for species analyzed.

| <b>Chemical</b>                    | <b>SMILES notation</b>                                                                                        |
|------------------------------------|---------------------------------------------------------------------------------------------------------------|
| <b>FeCl<sub>3</sub></b>            | <b>[Fe](Cl)(Cl)Cl</b>                                                                                         |
| <b>Pyrrole (Py)</b>                | <b>C1=CC=CN1</b>                                                                                              |
| <b>Polystyrene sulfonate (PSS)</b> | <b>CCC(C)C1=CC=C(C=C1)[S-](=O)(=O)=O</b>                                                                      |
| <b>Polypyrrole (PPy)</b>           | <b>C1(=CC=C(N1)C2=CC=C(N2)C3=CC=C(N3)C4=CC<br/>=C(N4)C5=CC=C(N5)C6=CC=C(N6)C7=CC=C(N7)C<br/>8=CC=C(N8)C)C</b> |
